# Supplementary material for: Sociogeomorphological Analysis in a Headwater Basin in Southern Brazil with Emphasis on Land Use and Land Cover Change
Source: MDPI journal article supplement (doi:10.3390/land12020306), 2023-01-21
Supplement: s1 [file s1]

**Table S1.** List of abbreviations.

| Abbreviation | Description                                                                      |
|--------------|----------------------------------------------------------------------------------|
| A            | Area of the reiver channels                                                      |
| ALOS         | Advanced Land Observing Satellite                                                |
| Dd           | Drainage Density                                                                 |
| DTM          | Digital Terrain Model                                                            |
| GPDEN        | Natural Disaster Research Group                                                  |
| GU           | Geomorphological units                                                           |
| Li           | Drainage network channels                                                        |
| LULC         | Land Use and Land Cover                                                          |
| LULCC        | Land Use and Land Cover Changes                                                  |
| MAP          | Mosaics of Agriculture and Pasture                                               |
| MH           | Mãe dos Homens Community                                                         |
| MH – F       | Intersection of Mãe dos Homens Community and Floodplain                          |
| MH – H       | Intersection of Mãe dos Homens Community and Hillslope                           |
| MH – P       | Intersection of Mãe dos Homens Community and Plateau                             |
| NP           | National Park                                                                    |
| NP – F       | Intersection of National Parks and Floodplain                                    |
| NP – H       | Intersection of National Parks and Hillslope                                     |
| NP – P       | Intersection of National Parks and Plateau                                       |
| NP-MH        | Intersection of National Parks and the Mãe dos Homens Community                  |
| NP-MH – F    | Intersection among National Parks, Mãe dos Homens Community and Floodplain       |
| NP-MH – H    | Intersection among National Parks, Mãe dos Homens Community and Hillslope        |
| NP-MH – P    | Intersection among National Parks, Mãe dos Homens Community and Plateau          |
| NP-QSR       | Intersection of National Parks and the Quilombola São Roque Community            |
| NP-QSR – F   | Intersection among National Parks, Quilombola São Roque Community and Floodplain |
| NP-QSR – H   | Intersection among National Parks, Quilombola São Roque Community and Hillslope  |
| NP-QSR – P   | Intersection among National Parks, Quilombola São Roque Community and Plateau    |
| OTC          | Other Temporary Crops                                                            |
| PALSAR       | Phased Array type L-band Synthetic Aperture Radar sensor                         |
| QSR          | Quilombola São Roque Community                                                   |
| QSR – F      | Intersection of Quilombola São Roque Community and Floodplain                    |
| QSR – H      | Intersection of Quilombola São Roque Community and Hillslope                     |
| QSR – P      | Intersection of Quilombola São Roque Community and Plateau                       |
| RS           | <i>Rio Grande do Sul</i>                                                         |
| S            | Slope                                                                            |
| SC           | <i>Santa Catarina</i>                                                            |
| SGU          | Sociogeomorphological Unit                                                       |
| SU           | Social Units                                                                     |
| UFRGS        | <i>Universidade federal do Rio Grande do Sul</i>                                 |
| Z            | Altitude                                                                         |
