# Supplementary material for: Sociogeomorphological Analysis in a Headwater Basin in Southern Brazil with Emphasis on Land Use and Land Cover Change
Source: MDPI journal article supplement (doi:10.3390/land12020306), 2023-01-21
Supplement: s1 [file s1]

Archive with 1 entries (1 files):
- land-2125619-supplementary.pdf
